# Supplementary material for: Seroprevalence of Hepatitis E in General, Hepatic, and Pregnant Populations in Nepal, Bangladesh, and Pakistan: A Systematic Review and Meta-Analysis
Source: Research Square preprint supplement (doi:10.21203/rs.3.rs-7339129/v1), 2025-08-22
Supplement: Supplementary file 1 [file 4c79b06ee39f026254cbc612.docx]

**Supplimentary Table 1. Detail search strategy**

| Database | Step | Yielded documents | Assessed for eligibility |
| --- | --- | --- | --- |
| Cochrane library | ((((((("hepatitis e"[MeSH Terms] OR "hepatitis e"[All Fields]) OR ("jaundice"[MeSH Terms] OR "jaundice"[All Fields])) OR (Acute[All Fields] AND ("hepatitis"[MeSH Terms] OR "hepatitis"[All Fields] OR "hepatitis a"[MeSH Terms] OR "hepatitis a"[All Fields]))) OR (Acute[All Fields] AND ("liver diseases"[MeSH Terms] OR ("liver"[All Fields] AND "diseases"[All Fields]) OR "liver diseases"[All Fields] OR ("liver"[All Fields] AND "disease"[All Fields]) OR "liver disease"[All Fields]))) AND ((((("pakistan"[MeSH Terms] OR "pakistan"[All Fields]) OR ("nepal"[MeSH Terms] OR "nepal"[All Fields])) OR ("bhutan"[MeSH Terms] OR "bhutan"[All Fields])) OR ("sri lanka"[MeSH Terms] OR ("sri"[All Fields] AND "lanka"[All Fields]) OR "sri lanka"[All Fields])) OR ((((("Maldives"[MeSH Terms] OR " Maldives"[All Fields]) OR OR ((((("Afghanistan"[MeSH Terms] OR " Afghanistan"[All Fields]) OR ("bangladesh"[MeSH Terms] OR "bangladesh"[All Fields])))) AND Humans[Mesh]) | 171 | 16 |
| PubMed | Same as above | 553 | 32 |
| Embase | Same as above | 963 | 75 |
| Manually | Same as above | 26 | 3 |
